# Supplementary material
Source: HighWire-hosted journal article supplement (https://bmjopen.bmj.com/content/8/3/e018331)
Supplement: inline-supplementary-material-1 [file inline-supplementary-material-1.pdf]

**Supplementary Data**

**An Electronic Health Records cohort study on Heart Failure Following Myocardial  
Infarction in England: Incidence and Predictors**

Johannes M.I.H. Gho, Amand F. Schmidt, Laura Pasea, Stefan Koudstaal, Mar Pujades-Rodriguez, Spiros Denaxas, Anoop D. Shah, Riyaz S. Patel, Chris P. Gale, Arno W. Hoes, John G. Cleland, Harry Hemingway, Folkert W. Asselbergs

## Phenotype coding lists

### CALIBER myocardial infarction phenotype

Fatal or non-fatal myocardial infarction (MI) as recorded in any of the constituent CALIBER data sources. The type of myocardial infarction (ST elevation MI, STEMI; or non ST elevation MI, NSTEMI) is recorded only in MINAP and CPRD.

Read codes used to identify myocardial infarction in primary care records (Clinical Research Practice Datalink)

| Category                                  | Clinical code | Clinical term                                              | Datasource lookup |
|-------------------------------------------|---------------|------------------------------------------------------------|-------------------|
| <b>STEMI (3)</b>                          | G30X000       | Acute ST segment elevation myocardial infarction           | 12229             |
| <b>NSTEMI (4)</b>                         | G307100       | Acute non-ST segment elevation myocardial infarction       | 10562             |
| <b>Acute MI not further specified (5)</b> | 323..00       | ECG: myocardial infarction                                 | 7783              |
| <b>Acute MI not further specified (5)</b> | 3233.00       | ECG: antero-septal infarct.                                | 26975             |
| <b>Acute MI not further specified (5)</b> | 3234.00       | ECG:posterior/inferior infarct                             | 26972             |
| <b>Acute MI not further specified (5)</b> | 3235.00       | ECG: subendocardial infarct                                | 55401             |
| <b>Acute MI not further specified (5)</b> | 3236.00       | ECG: lateral infarction                                    | 52705             |
| <b>Acute MI not further specified (5)</b> | 323Z.00       | ECG: myocardial infarct NOS                                | 59032             |
| <b>Acute MI not further specified (5)</b> | 889A.00       | Diab mellit insulin-glucose infus acute myocardial infarct | 61670             |
| <b>Acute MI not further specified (5)</b> | G30..00       | Acute myocardial infarction                                | 241               |
| <b>Acute MI not further specified (5)</b> | G30..12       | Coronary thrombosis                                        | 2491              |
| <b>Acute MI not further specified (5)</b> | G30..13       | Cardiac rupture following myocardial infarction (MI)       | 30421             |
| <b>Acute MI not further specified (5)</b> | G30..15       | MI - acute myocardial infarction                           | 1677              |
| <b>Acute MI not further specified (5)</b> | G30..16       | Thrombosis - coronary                                      | 13571             |
| <b>Acute MI not further specified (5)</b> | G300.00       | Acute anterolateral infarction                             | 12139             |
| <b>Acute MI not further specified (5)</b> | G301.00       | Other specified anterior myocardial infarction             | 5387              |
| <b>Acute MI not further specified (5)</b> | G301000       | Acute anteroapical infarction                              | 40429             |
| <b>Acute MI not further specified (5)</b> | G301100       | Acute anteroseptal infarction                              | 17872             |
| <b>Acute MI not further specified (5)</b> | G301z00       | Anterior myocardial infarction NOS                         | 14897             |
| <b>Acute MI not further specified (5)</b> | G302.00       | Acute inferolateral infarction                             | 8935              |
| <b>Acute MI not further specified (5)</b> | G303.00       | Acute inferoposterior infarction                           | 29643             |
| <b>Acute MI not further specified (5)</b> | G304.00       | Posterior myocardial infarction NOS                        | 23892             |
| <b>Acute MI not further specified (5)</b> | G305.00       | Lateral myocardial infarction NOS                          | 14898             |
| <b>Acute MI not further specified (5)</b> | G306.00       | True posterior myocardial infarction                       | 63467             |
| <b>Acute MI not further specified (5)</b> | G307.00       | Acute subendocardial infarction                            | 3704              |
| <b>Acute MI not further specified (5)</b> | G307000       | Acute non-Q wave infarction                                | 9507              |

|                                           |         |                                                              |       |
|-------------------------------------------|---------|--------------------------------------------------------------|-------|
| <b>Acute MI not further specified (5)</b> | G308.00 | Inferior myocardial infarction NOS                           | 1678  |
| <b>Acute MI not further specified (5)</b> | G309.00 | Acute Q-wave infarct                                         | 30330 |
| <b>Acute MI not further specified (5)</b> | G30B.00 | Acute posterolateral myocardial infarction                   | 32854 |
| <b>Acute MI not further specified (5)</b> | G30X.00 | Acute transmural myocardial infarction of unspecif site      | 29758 |
| <b>Acute MI not further specified (5)</b> | G30y.00 | Other acute myocardial infarction                            | 34803 |
| <b>Acute MI not further specified (5)</b> | G30y000 | Acute atrial infarction                                      | 28736 |
| <b>Acute MI not further specified (5)</b> | G30y100 | Acute papillary muscle infarction                            | 62626 |
| <b>Acute MI not further specified (5)</b> | G30y200 | Acute septal infarction                                      | 41221 |
| <b>Acute MI not further specified (5)</b> | G30yz00 | Other acute myocardial infarction NOS                        | 46017 |
| <b>Acute MI not further specified (5)</b> | G30z.00 | Acute myocardial infarction NOS                              | 14658 |
| <b>Acute MI not further specified (5)</b> | G31y100 | Microinfarction of heart                                     | 68357 |
| <b>Acute MI not further specified (5)</b> | G38..00 | Postoperative myocardial infarction                          | 32272 |
| <b>Acute MI not further specified (5)</b> | G380.00 | Postoperative transmural myocardial infarction anterior wall | 46112 |
| <b>Acute MI not further specified (5)</b> | G381.00 | Postoperative transmural myocardial infarction inferior wall | 46276 |
| <b>Acute MI not further specified (5)</b> | G384.00 | Postoperative subendocardial myocardial infarction           | 41835 |
| <b>Acute MI not further specified (5)</b> | G38z.00 | Postoperative myocardial infarction, unspecified             | 68748 |
| <b>Acute MI not further specified (5)</b> | Gyu3400 | [X]Acute transmural myocardial infarction of unspecif site   | 96838 |

#### Hospital Episode Statistics

| <b>Category (code)</b>                    | ICD10 code | ICD10 term                  |
|-------------------------------------------|------------|-----------------------------|
| <b>Acute MI not further specified (5)</b> | I21        | Acute myocardial infarction |

#### OPCS

| <b>Category (code)</b>                        | OPCS 4 | OPCS 4 term                                                                           |
|-----------------------------------------------|--------|---------------------------------------------------------------------------------------|
| <b>Transluminal coronary thrombolysis (2)</b> | K50.2  | Percutaneous transluminal coronary thrombolysis using streptokinase                   |
| <b>Transluminal coronary thrombolysis (2)</b> | K50.3  | Percutaneous transluminal injection of therapeutic substance into coronary artery NEC |

#### Office for National Statistics (ONS)

| <b>Category (code)</b>   | ICD10 code | ICD10 term                                                          |
|--------------------------|------------|---------------------------------------------------------------------|
| <b>Death from MI (3)</b> | I21        | Acute myocardial infarction                                         |
| <b>Death from MI (3)</b> | I22        | Subsequent myocardial infarction                                    |
| <b>Death from MI (3)</b> | I23        | Certain current complications following acute myocardial infarction |

#### Office for National Statistics (ONS) prior to 2000 (ICD9)

| <b>Category (code)</b>                      | ICD9 code | ICD9 term                                                                                     |
|---------------------------------------------|-----------|-----------------------------------------------------------------------------------------------|
| <b>Death from myocardial infarction (3)</b> | 410       | Acute myocardial infarction                                                                   |
| <b>Death from myocardial infarction (3)</b> | 4110      | Other acute and subacute forms of ischemic heart disease ; Postmyocardial infarction syndrome |

**Death from myocardial infarction (3)** 4297 Ill-defined descriptions and complications of heart disease ; Certain sequelae of myocardial infarction, not elsewhere classified

Myocardial Ischaemia National Audit Project (MINAP)

- 1 Acute STEMI
- 2 Acute NSTEMI

## Phenotype coding lists

### CALIBER myocardial infarction phenotype

Fatal or non-fatal myocardial infarction (MI) as recorded in any of the constituent CALIBER data sources. The type of myocardial infarction (ST elevation MI, STEMI; or non ST elevation MI, NSTEMI) is recorded only in MINAP and CPRD.

Read codes used to identify myocardial infarction in primary care records (Clinical Research Practice Datalink)

| Category                                  | Clinical code | Clinical term                                              | Datasource lookup |
|-------------------------------------------|---------------|------------------------------------------------------------|-------------------|
| <b>STEMI (3)</b>                          | G30X000       | Acute ST segment elevation myocardial infarction           | 12229             |
| <b>NSTEMI (4)</b>                         | G307100       | Acute non-ST segment elevation myocardial infarction       | 10562             |
| <b>Acute MI not further specified (5)</b> | 323..00       | ECG: myocardial infarction                                 | 7783              |
| <b>Acute MI not further specified (5)</b> | 3233.00       | ECG: antero-septal infarct.                                | 26975             |
| <b>Acute MI not further specified (5)</b> | 3234.00       | ECG:posterior/inferior infarct                             | 26972             |
| <b>Acute MI not further specified (5)</b> | 3235.00       | ECG: subendocardial infarct                                | 55401             |
| <b>Acute MI not further specified (5)</b> | 3236.00       | ECG: lateral infarction                                    | 52705             |
| <b>Acute MI not further specified (5)</b> | 323Z.00       | ECG: myocardial infarct NOS                                | 59032             |
| <b>Acute MI not further specified (5)</b> | 889A.00       | Diab mellit insulin-glucose infus acute myocardial infarct | 61670             |
| <b>Acute MI not further specified (5)</b> | G30..00       | Acute myocardial infarction                                | 241               |
| <b>Acute MI not further specified (5)</b> | G30..12       | Coronary thrombosis                                        | 2491              |
| <b>Acute MI not further specified (5)</b> | G30..13       | Cardiac rupture following myocardial infarction (MI)       | 30421             |
| <b>Acute MI not further specified (5)</b> | G30..15       | MI - acute myocardial infarction                           | 1677              |
| <b>Acute MI not further specified (5)</b> | G30..16       | Thrombosis - coronary                                      | 13571             |
| <b>Acute MI not further specified (5)</b> | G300.00       | Acute anterolateral infarction                             | 12139             |
| <b>Acute MI not further specified (5)</b> | G301.00       | Other specified anterior myocardial infarction             | 5387              |
| <b>Acute MI not further specified (5)</b> | G301000       | Acute anteroapical infarction                              | 40429             |
| <b>Acute MI not further specified (5)</b> | G301100       | Acute anteroseptal infarction                              | 17872             |
| <b>Acute MI not further specified (5)</b> | G301z00       | Anterior myocardial infarction NOS                         | 14897             |
| <b>Acute MI not further specified (5)</b> | G302.00       | Acute inferolateral infarction                             | 8935              |
| <b>Acute MI not further specified (5)</b> | G303.00       | Acute inferoposterior infarction                           | 29643             |
| <b>Acute MI not further specified (5)</b> | G304.00       | Posterior myocardial infarction NOS                        | 23892             |
| <b>Acute MI not further specified (5)</b> | G305.00       | Lateral myocardial infarction NOS                          | 14898             |

|                                           |         |                                                              |       |
|-------------------------------------------|---------|--------------------------------------------------------------|-------|
| <b>Acute MI not further specified (5)</b> | G306.00 | True posterior myocardial infarction                         | 63467 |
| <b>Acute MI not further specified (5)</b> | G307.00 | Acute subendocardial infarction                              | 3704  |
| <b>Acute MI not further specified (5)</b> | G307000 | Acute non-Q wave infarction                                  | 9507  |
| <b>Acute MI not further specified (5)</b> | G308.00 | Inferior myocardial infarction NOS                           | 1678  |
| <b>Acute MI not further specified (5)</b> | G309.00 | Acute Q-wave infarct                                         | 30330 |
| <b>Acute MI not further specified (5)</b> | G30B.00 | Acute posterolateral myocardial infarction                   | 32854 |
| <b>Acute MI not further specified (5)</b> | G30X.00 | Acute transmural myocardial infarction of unspecif site      | 29758 |
| <b>Acute MI not further specified (5)</b> | G30y.00 | Other acute myocardial infarction                            | 34803 |
| <b>Acute MI not further specified (5)</b> | G30y000 | Acute atrial infarction                                      | 28736 |
| <b>Acute MI not further specified (5)</b> | G30y100 | Acute papillary muscle infarction                            | 62626 |
| <b>Acute MI not further specified (5)</b> | G30y200 | Acute septal infarction                                      | 41221 |
| <b>Acute MI not further specified (5)</b> | G30yz00 | Other acute myocardial infarction NOS                        | 46017 |
| <b>Acute MI not further specified (5)</b> | G30z.00 | Acute myocardial infarction NOS                              | 14658 |
| <b>Acute MI not further specified (5)</b> | G31y100 | Microinfarction of heart                                     | 68357 |
| <b>Acute MI not further specified (5)</b> | G38..00 | Postoperative myocardial infarction                          | 32272 |
| <b>Acute MI not further specified (5)</b> | G380.00 | Postoperative transmural myocardial infarction anterior wall | 46112 |
| <b>Acute MI not further specified (5)</b> | G381.00 | Postoperative transmural myocardial infarction inferior wall | 46276 |
| <b>Acute MI not further specified (5)</b> | G384.00 | Postoperative subendocardial myocardial infarction           | 41835 |
| <b>Acute MI not further specified (5)</b> | G38z.00 | Postoperative myocardial infarction, unspecified             | 68748 |
| <b>Acute MI not further specified (5)</b> | Gyu3400 | [X]Acute transmural myocardial infarction of unspecif site   | 96838 |

#### Hospital Episode Statistics

| <b>Category (code)</b>                    | ICD10 code | ICD10 term                  |
|-------------------------------------------|------------|-----------------------------|
| <b>Acute MI not further specified (5)</b> | I21        | Acute myocardial infarction |

#### OPCS

| <b>Category (code)</b>                        | OPCS 4 | OPCS 4 term                                                                           |
|-----------------------------------------------|--------|---------------------------------------------------------------------------------------|
| <b>Transluminal coronary thrombolysis (2)</b> | K50.2  | Percutaneous transluminal coronary thrombolysis using streptokinase                   |
| <b>Transluminal coronary thrombolysis (2)</b> | K50.3  | Percutaneous transluminal injection of therapeutic substance into coronary artery NEC |

#### Office for National Statistics (ONS)

| <b>Category (code)</b>   | ICD10 code | ICD10 term                                                          |
|--------------------------|------------|---------------------------------------------------------------------|
| <b>Death from MI (3)</b> | I21        | Acute myocardial infarction                                         |
| <b>Death from MI (3)</b> | I22        | Subsequent myocardial infarction                                    |
| <b>Death from MI (3)</b> | I23        | Certain current complications following acute myocardial infarction |

#### Office for National Statistics (ONS) prior to 2000 (ICD9)

| Category (code)                      | ICD9 code | ICD9 term                                                                                                                         |
|--------------------------------------|-----------|-----------------------------------------------------------------------------------------------------------------------------------|
| Death from myocardial infarction (3) | 410       | Acute myocardial infarction                                                                                                       |
| Death from myocardial infarction (3) | 4110      | Other acute and subacute forms of ischemic heart disease ; Postmyocardial infarction syndrome                                     |
| Death from myocardial infarction (3) | 4297      | Ill-defined descriptions and complications of heart disease ; Certain sequelae of myocardial infarction, not elsewhere classified |

Myocardial Ischaemia National Audit Project (MINAP)

- 1 Acute STEMI
- 2 Acute NSTEMI

### CALIBER heart failure phenotype

Primary care

1. Diagnosis of left ventricular dysfunction during echocardiogram during a consultation
2. Diagnosis of heart failure of valvular cause during a consultation
3. Diagnosis of heart failure due to hypertension during a consultation
4. Diagnosis of heart failure due to unspecified cause during a consultation
5. Diagnosis of heart failure not otherwise specified during a consultation

Secondary care

1. Diagnosis of heart failure due to hypertension as the primary diagnosis during a hospitalization
2. Diagnosis of heart failure not otherwise specified as the primary diagnosis during a hospitalization

Mortality

1. Hypertensive heart failure as the underlying cause of death
2. Heart failure not otherwise specified as the underlying cause of death

Read codes used to identify myocardial infarction in primary care records (Clinical Research Practice Datalink)

| Category (code)                           | Clinical code | Clinical term                                               | Datasource lookup |
|-------------------------------------------|---------------|-------------------------------------------------------------|-------------------|
| Heart failure due to valvular disease (3) | G580400       | Congestive heart failure due to valvular disease            | 94870             |
| Heart failure due to hypertension (4)     | G210.00       | Malignant hypertensive heart disease                        | 50157             |
| Heart failure due to hypertension (4)     | G210000       | Malignant hypertensive heart disease without CCF            | 95334             |
| Heart failure due to hypertension (4)     | G210100       | Malignant hypertensive heart disease with CCF               | 72668             |
| Heart failure due to hypertension (4)     | G211100       | Benign hypertensive heart disease with CCF                  | 52127             |
| Heart failure due to hypertension (4)     | G21z100       | Hypertensive heart disease NOS with CCF                     | 62718             |
| Heart failure due to hypertension (4)     | G230.00       | Malignant hypertensive heart and renal disease              | 67232             |
| Heart failure due to hypertension (4)     | G232.00       | Hypertensive heart&renal dis wth (congestive) heart failure | 21837             |
| Heart failure due to hypertension (4)     | G234.00       | Hyperten heart&renal dis+both(congestv)heart and renal fail | 57987             |
| Heart failure due to other cause (5)      | G1yz100       | Rheumatic left ventricular failure                          | 22262             |
| Heart failure NOS (6)                     | 1O1..00       | Heart failure confirmed                                     | 9913              |
| Heart failure NOS (6)                     | 662W.00       | Heart failure annual review                                 | 30779             |
| Heart failure NOS (6)                     | 662p.00       | Heart failure 6 month review                                | 83502             |
| Heart failure NOS (6)                     | 8B29.00       | Cardiac failure therapy                                     | 24503             |
| Heart failure NOS (6)                     | 8H2S.00       | Admit heart failure emergency                               | 32898             |
| Heart failure NOS (6)                     | 9Or0.00       | Heart failure review completed                              | 19380             |
| Heart failure NOS (6)                     | G400.00       | Acute cor pulmonale                                         | 8464              |
| Heart failure NOS (6)                     | G41z.11       | Chronic cor pulmonale                                       | 5695              |
| Heart failure NOS (6)                     | G554000       | Congestive cardiomyopathy                                   | 5141              |
| Heart failure NOS (6)                     | G554011       | Congestive obstructive cardiomyopathy                       | 68766             |
| Heart failure NOS (6)                     | G58..00       | Heart failure                                               | 2062              |
| Heart failure NOS (6)                     | G58..11       | Cardiac failure                                             | 1223              |
| Heart failure NOS (6)                     | G580.00       | Congestive heart failure                                    | 398               |

|                                  |         |                                                             |       |
|----------------------------------|---------|-------------------------------------------------------------|-------|
| Heart failure NOS (6)            | G580.11 | Congestive cardiac failure                                  | 2906  |
| Heart failure NOS (6)            | G580.12 | Right heart failure                                         | 10079 |
| Heart failure NOS (6)            | G580.13 | Right ventricular failure                                   | 10154 |
| Heart failure NOS (6)            | G580.14 | Biventricular failure                                       | 9524  |
| Heart failure NOS (6)            | G580000 | Acute congestive heart failure                              | 23707 |
| Heart failure NOS (6)            | G580100 | Chronic congestive heart failure                            | 32671 |
| Heart failure NOS (6)            | G580200 | Decompensated cardiac failure                               | 27884 |
| Heart failure NOS (6)            | G580300 | Compensated cardiac failure                                 | 11424 |
| Heart failure NOS (6)            | G581.00 | Left ventricular failure                                    | 884   |
| Heart failure NOS (6)            | G581.11 | Asthma - cardiac                                            | 23481 |
| Heart failure NOS (6)            | G581.13 | Impaired left ventricular function                          | 5942  |
| Heart failure NOS (6)            | G581000 | Acute left ventricular failure                              | 5255  |
| Heart failure NOS (6)            | G582.00 | Acute heart failure                                         | 27964 |
| Heart failure NOS (6)            | G58z.00 | Heart failure NOS                                           | 4024  |
| Heart failure NOS (6)            | G58z.12 | Cardiac failure NOS                                         | 17278 |
| Heart failure NOS (6)            | G5yy900 | Left ventricular systolic dysfunction                       | 8966  |
| Heart failure NOS (6)            | G5yyA00 | Left ventricular diastolic dysfunction                      | 12550 |
| Heart failure NOS (6)            | R2y1000 | [D]Cardiorespiratory failure                                | 20324 |
| Left ventricular dysfunction (3) | 585f.00 | Echocardiogram shows left ventricular systolic dysfunction  | 11284 |
| Left ventricular dysfunction (3) | 585g.00 | Echocardiogram shows left ventricular diastolic dysfunction | 11351 |

#### Hospital Episode Statistics

| Category (code)                  | ICD10 code | ICD10 term                                                                                  |
|----------------------------------|------------|---------------------------------------------------------------------------------------------|
| HF - hypertension cause (4)      | I110       | Hypertensive heart disease with (congestive) heart failure                                  |
| HF - hypertension cause (4)      | I130       | Hypertensive heart and renal disease with (congestive) heart failure                        |
| HF - hypertension cause (4)      | I132       | Hypertensive heart and renal disease with both (congestive) heart failure and renal failure |
| HF - other unspecified cause (5) | I260       | Pulmonary embolism with mention of acute cor pulmonale                                      |
| HF - not otherwise specified (6) | I50        | Heart failure                                                                               |

#### Office for National Statistics (ONS)

| Category (code)                              | ICD10 code | ICD10 term                                                                                  |
|----------------------------------------------|------------|---------------------------------------------------------------------------------------------|
| Hypertensive heart failure (4)               | I110       | Hypertensive heart disease with (congestive) heart failure                                  |
| Hypertensive heart failure (4)               | I130       | Hypertensive heart and renal disease with (congestive) heart failure                        |
| Hypertensive heart failure (4)               | I132       | Hypertensive heart and renal disease with both (congestive) heart failure and renal failure |
| Heart failure with other specified cause (5) | I260       | Pulmonary embolism with mention of acute cor pulmonale                                      |
| Heart failure with unspecified cause (6)     | I50        | Heart failure                                                                               |

#### Office for National Statistics (ONS) prior to 2000 (ICD9)

| Category (code)                              | ICD9 code | ICD9 term                                                         |
|----------------------------------------------|-----------|-------------------------------------------------------------------|
| Heart failure with other specified cause (5) | 4151      | Acute pulmonary heart disease ; Pulmonary embolism and infarction |
| Heart failure with unspecified cause (6)     | 428       | Heart failure                                                     |

#### Myocardial Ischaemia National Audit Project (MINAP)

1 CCF

#### CALIBER baseline definitions

See also: <https://www.caliberresearch.org>

Definitions used for smoking at baseline

CPRD:

**smoking\_cessation\_gprd**

Prescription of smoking cessation medication in primary care. Currently lookup is performed from using BNF chapter 4.10.2.

**smoking\_status\_gprd**

An individual record of smoking status in primary care. A patient may have multiple records of smoking status.

HES:

**smoking\_status\_hes**

Smoking status recorded in HES. Currently there are only ICD-10 codes for smoking, no codes for ex-smoking or non-smoking.

Definitions used for hypertension at baseline

CPRD:

**ht\_gprd**

Diagnosis of hypertension

HES:

**ht\_hes**

Hypertension diagnosis recorded in secondary care.

Definitions used for diabetes at baseline

CPRD:

**dm\_gprd**

Type of diabetes diagnosis at a particular point in time.

**diabdiag\_gprd**

GP diagnosis of diabetes mellitus using a specific type I or type II diagnosis in the Read diagnosis chapter (i.e. codes starting with C08, C09, C10E, C10F). Vague terms such as `juvenile onset diabetes` or `insulin dependent diabetes` are not included.

HES:

**dm\_hes**

Diagnosis of diabetes in secondary care (HES).



## Supplementary Methods

### **Ethical approval**

CALIBER was approved by the Lewisham Local Research Ethics Committee (ref: 09/H0810/16 date: 08/04/2009) and the Ethics and Confidentiality Committee (ECC) (ref: ECC 2-06(b)/2009 CALIBER dataset). CALIBER has been registered with the University College London Data Protection Officer (ref: Z6364106/2009/2/26). CALIBER EHR data are anonymised; individual informed consent was not sought from study participants.

### **Multiple imputation algorithm**

Multiple imputation was implemented using the 'mice' package for R, to replace missing values in prognostic covariates (body mass index, smoking, systolic and diastolic blood pressure).<sup>1</sup> Imputation models included general practice and 3-year periods from 1998 to 2010 of index myocardial infarction (MI) and:

1. All the baseline covariates as used in the multivariable analysis (age, sex, index of multiple deprivation, hypertension, diabetes, type of MI, body mass index, smoking, systolic blood pressure, diastolic blood pressure);
2. Baseline measurements of covariates not considered in the multivariable analysis (alcohol intake, haemoglobin, white blood cell count, creatinine, alanine aminotransferase (ALAT), total cholesterol, HDL cholesterol);
3. Baseline medications prior to index MI (antiplatelet, oral anticoagulant, statin, ACE inhibitor, angiotensin receptor blocker (ARB), beta-blocker, calcium channel blocker, loop diuretic, aldosterone antagonist, digoxin);
4. Coexisting medical conditions (history of atrial fibrillation, peripheral arterial disease, depression, cancer, chronic obstructive pulmonary disease);
5. The Nelson-Aalen hazard and the event status for the outcomes analysed.

Missing data was multiply imputed and across 20 datasets a (stratified) multivariable Cox regression model was fit and results were combined using Rubin's rules.<sup>2</sup>

### References

1. van Buuren S. Multiple imputation of discrete and continuous data by fully conditional specification. *Stat Methods Med Res* 2007;16:219-42.
2. Carpenter JR, Kenward MG. *Multiple Imputation and its Application*: Wiley; 2013.

**Table S1 - Hazard ratios for heart failure in patients following a first myocardial infarction using the competing risks regression based on Fine and Gray's proportional subhazards model to account for the competing risk of all cause mortality**

|                                                  | Model 1            | Model 2            | Model 3            | Model 4            |
|--------------------------------------------------|--------------------|--------------------|--------------------|--------------------|
|                                                  | HR (95% CI)        | HR (95% CI)        | HR (95% CI)        | HR (95% CI)        |
| Age, per 10 years increase                       | 1.41 (1.38 – 1.44) | 1.39 (1.36 – 1.42) | 1.36 (1.33 – 1.39) | 1.35 (1.32 – 1.38) |
| Men                                              | 1.04 (0.99 – 1.10) | 1.07 (1.01 – 1.13) | 1.06 (1.00 – 1.12) | 1.05 (1.00 – 1.11) |
| Index of multiple deprivation                    |                    | overall p = <0.001 | overall p = <0.001 | overall p = <0.001 |
| Q1                                               |                    | Reference          | Reference          | Reference          |
| Q2                                               |                    | 1.11 (1.03 – 1.21) | 1.11 (1.02 – 1.20) | 1.10 (1.01 – 1.20) |
| Q3                                               |                    | 1.21 (1.12 – 1.32) | 1.20 (1.11 – 1.31) | 1.19 (1.09 – 1.29) |
| Q4                                               |                    | 1.24 (1.14 – 1.35) | 1.24 (1.14 – 1.34) | 1.22 (1.12 – 1.32) |
| Q5                                               |                    | 1.36 (1.25 – 1.47) | 1.35 (1.25 – 1.47) | 1.32 (1.21 – 1.43) |
| History of hypertension                          |                    | 1.15 (1.09 – 1.22) | 1.13 (1.07 – 1.19) | 1.14 (1.08 – 1.21) |
| History of diabetes                              |                    | 1.39 (1.29 – 1.49) | 1.38 (1.29 – 1.48) | 1.36 (1.27 – 1.47) |
| History of atrial fibrillation                   |                    |                    | 1.50 (1.40 – 1.61) | 1.49 (1.39 – 1.60) |
| Type of MI                                       |                    |                    |                    |                    |
| STEMI                                            |                    |                    | 1.10 (1.03 – 1.18) | 1.11 (1.03 – 1.18) |
| History of peripheral arterial disease           |                    |                    |                    | 1.29 (1.19 – 1.40) |
| History of COPD                                  |                    |                    |                    | 1.18 (1.09 – 1.29) |
| ACE inhibitor use before MI                      |                    |                    |                    | 1.01 (0.95 – 1.08) |
| Angiotensin receptor blocker (ARB) use before MI |                    |                    |                    | 0.94 (0.85 – 1.05) |
| Beta-blocker use before MI                       |                    |                    |                    | 0.94 (0.88 – 1.00) |

Complete case analysis with the addition of clinically relevant variables per model (n = 24,479, n events = 5,775). Overall p-values are shown for categorical covariates. ACE=Angiotensin-converting enzyme; CI=confidence interval; COPD=chronic obstructive pulmonary disease; MI=myocardial infarction; NSTEMI=non-ST-segment-elevation myocardial infarction; STEMI=ST-segment-elevation myocardial infarction; Q=quintile; HR=ratio of the subdistribution hazards.

**Table S2 - Hazard ratios for heart failure in patients following a first myocardial infarction in sensitivity analyses**

|                                                  | Model 5<br>Cox regression<br>complete case without<br>multiple imputation<br>n = 4,898<br>n events = 1,159 | Model 5<br>Cox regression<br>with multiple imputation<br>n = 24,479<br>n events = 5,775 | Model 5<br>Competing risk analysis<br>with complete case<br>n = 4,898<br>n events = 1,159 |
|--------------------------------------------------|------------------------------------------------------------------------------------------------------------|-----------------------------------------------------------------------------------------|-------------------------------------------------------------------------------------------|
|                                                  | HR (95% CI)                                                                                                | HR (95% CI)                                                                             | HR (95% CI)                                                                               |
| Age, per 10 years increase                       | 1.48 (1.38 – 1.60)                                                                                         | 1.47 (1.43 – 1.51)                                                                      | 1.44 (1.35 – 1.54)                                                                        |
| Men                                              | 1.03 (0.89 – 1.19)                                                                                         | 1.07 (1.01 – 1.13)                                                                      | 1.07 (0.95 – 1.22)                                                                        |
| Body mass index (BMI in kg/m <sup>2</sup> )      | p = 0.005                                                                                                  | p = <0.001                                                                              | p = < 0.001                                                                               |
| Underweight (18.5 <)                             | 0.78 (0.48 – 1.32)                                                                                         | 0.76 (0.58 – 0.99)                                                                      | 0.71 (0.45 – 1.12)                                                                        |
| Normal (18.5; 25)                                | Reference                                                                                                  | Reference                                                                               | Reference                                                                                 |
| Overweight (25, 30)                              | 0.84 (0.71 – 0.99)                                                                                         | 0.84 (0.76 – 0.92)                                                                      | 0.84 (0.73 – 0.97)                                                                        |
| Obese (>30)                                      | 1.12 (0.94 – 1.34)                                                                                         | 0.98 (0.90 – 1.08)                                                                      | 1.17 (1.00 – 1.36)                                                                        |
| Index of multiple deprivation                    | p = 0.040                                                                                                  | p < 0.001                                                                               | p = < 0.001                                                                               |
| Q1                                               | Reference                                                                                                  | Reference                                                                               | Reference                                                                                 |
| Q2                                               | 1.22 (0.94 – 1.58)                                                                                         | 1.08 (0.98 – 1.19)                                                                      | 1.35 (1.10 – 1.66)                                                                        |
| Q3                                               | 1.34 (1.03 – 1.75)                                                                                         | 1.17 (1.06 – 1.30)                                                                      | 1.40 (1.14 – 1.71)                                                                        |
| Q4                                               | 1.23 (0.93 – 1.63)                                                                                         | 1.16 (1.05 – 1.29)                                                                      | 1.31 (1.07 – 1.61)                                                                        |
| Q5                                               | 1.45 (1.09 – 1.92)                                                                                         | 1.25 (1.12 – 1.40)                                                                      | 1.61 (1.33 – 1.96)                                                                        |
| Smoking status                                   | p = 0.792                                                                                                  | p = 0.012                                                                               | p = 0.952                                                                                 |
| Non-smoker                                       | Reference                                                                                                  | Reference                                                                               | Reference                                                                                 |
| Current smoker                                   | 0.95 (0.77 – 1.14)                                                                                         | 1.14 (1.04 – 1.25)                                                                      | 1.02 (0.86 – 1.20)                                                                        |
| Ex-smoker                                        | 0.98 (0.83 – 1.15)                                                                                         | 1.03 (0.94 – 1.12)                                                                      | 0.99 (0.87 – 1.14)                                                                        |
| History of hypertension                          | 1.14 (0.96 – 1.35)                                                                                         | 1.16 (1.09 – 1.24)                                                                      | 1.18 (1.02 – 1.37)                                                                        |
| History of diabetes                              | 1.28 (1.09 – 1.49)                                                                                         | 1.46 (1.36 – 1.58)                                                                      | 1.23 (1.08 – 1.39)                                                                        |
| History of atrial fibrillation                   | 1.49 (1.25 – 1.76)                                                                                         | 1.63 (1.51 – 1.75)                                                                      | 1.37 (1.18 – 1.59)                                                                        |
| Type of MI                                       |                                                                                                            |                                                                                         |                                                                                           |
| STEMI                                            | 1.15 (0.97 – 1.37)                                                                                         | 1.18 (1.10 – 1.27)                                                                      | 1.10 (0.95 – 1.28)                                                                        |
| History of peripheral arterial disease           | 1.53 (1.25 – 1.87)                                                                                         | 1.37 (1.25 – 1.50)                                                                      | 1.33 (1.13 – 1.57)                                                                        |
| History of COPD                                  | 1.21 (0.99 – 1.48)                                                                                         | 1.24 (1.15 – 1.38)                                                                      | 1.22 (1.03 – 1.44)                                                                        |
| Systolic blood pressure, per 10 mmHg increase    | 0.99 (0.95 – 1.03)                                                                                         | 1.00 (0.98 – 1.02)                                                                      | 1.01 (0.97 – 1.04)                                                                        |
| Diastolic blood pressure, per 10 mmHg increase   | 1.01 (0.94 – 1.09)                                                                                         | 0.99 (0.96 – 1.03)                                                                      | 0.99 (0.93 – 1.06)                                                                        |
| ACE inhibitor use before MI                      | 1.01 (0.87 – 1.17)                                                                                         | 1.06 (0.99 – 1.14)                                                                      | 1.07 (0.94 – 1.21)                                                                        |
| Angiotensin receptor blocker (ARB) use before MI | 0.99 (0.95 – 1.03)                                                                                         | 1.00 (0.90 – 1.12)                                                                      | 0.93 (0.78 – 1.12)                                                                        |
| Beta-blocker use before MI                       | 1.01 (0.94 – 1.09)                                                                                         | 0.94 (0.88 – 1.00)                                                                      | 0.90 (0.79 – 1.02)                                                                        |

Using multivariable Cox regression without and with multiple imputation and the competing risks regression based on Fine and Gray's proportional subhazards model to account for the competing risk of all cause mortality (n = 4898, n events = 1159). Additional prognostic covariates: body mass index, smoking, systolic and diastolic blood pressure. Overall p-values are shown for categorical covariates. HR=hazard ratio; CI=confidence interval; MI=myocardial infarction; NSTEMI=non-ST-segment-elevation myocardial infarction; STEMI=ST-segment-elevation myocardial infarction; COPD=chronic obstructive pulmonary disease; ACE=Angiotensin-converting enzyme; Q=quintile.

**Table S3 - Hazard ratios for heart failure in patients following a first myocardial infarction stratified on having a previous cancer diagnosis or not.**

|                                                  | Model 4<br>Subjects without a<br>history of cancer<br>n = 21,719<br>n events = 5,029<br>HR (95% CI) | Model 4<br>Subjects with a<br>history of cancer<br>n = 2,760<br>n events = 746<br>HR (95% CI) |
|--------------------------------------------------|-----------------------------------------------------------------------------------------------------|-----------------------------------------------------------------------------------------------|
| Age, per 10 years increase                       | 1.49 (1.45 – 1.53)                                                                                  | 1.45 (1.30 – 1.61)                                                                            |
| Men                                              | 1.08 (1.01 – 1.15)                                                                                  | 1.13 (0.93 – 1.37)                                                                            |
| Index of multiple deprivation                    | overall p = <0.001                                                                                  | overall p = <0.001                                                                            |
| Q1                                               | Reference                                                                                           | Reference                                                                                     |
| Q2                                               | 1.08 (0.97 – 1.20)                                                                                  | 1.07 (0.77 – 1.48)                                                                            |
| Q3                                               | 1.17 (1.05 – 1.31)                                                                                  | 1.27 (0.91 – 1.78)                                                                            |
| Q4                                               | 1.17 (1.04 – 1.31)                                                                                  | 1.14 (0.79 – 1.66)                                                                            |
| Q5                                               | 1.25 (1.10 – 1.41)                                                                                  | 1.43 (0.97 – 2.11)                                                                            |
| History of hypertension                          | 1.11 (1.03 – 1.18)                                                                                  | 1.45 (1.16 – 1.81)                                                                            |
| History of diabetes                              | 1.53 (1.41 – 1.66)                                                                                  | 1.19 (0.91 – 1.55)                                                                            |
| History of atrial fibrillation                   | 1.62 (1.49 – 1.76)                                                                                  | 1.67 (1.33 – 2.09)                                                                            |
| Type of MI                                       |                                                                                                     |                                                                                               |
| STEMI                                            | 1.18 (1.09 – 1.28)                                                                                  | 1.01 (0.77 – 1.31)                                                                            |
| History of peripheral arterial disease           | 1.39 (1.26 – 1.54)                                                                                  | 1.19 (0.88 – 1.62)                                                                            |
| History of COPD                                  | 1.30 (1.18 – 1.43)                                                                                  | 1.36 (1.03 – 1.81)                                                                            |
| ACE inhibitor use before MI                      | 1.11 (1.03 – 1.20)                                                                                  | 1.00 (0.79 – 1.26)                                                                            |
| Angiotensin receptor blocker (ARB) use before MI | 1.06 (0.93 – 1.20)                                                                                  | 0.92 (0.65 – 1.31)                                                                            |
| Beta-blocker use before MI                       | 0.97 (0.90 – 1.04)                                                                                  | 0.99 (0.79 – 1.24)                                                                            |

All analyses are based on a complete case analysis. Overall p-values are shown for categorical covariates. ACE=Angiotensin-converting enzyme; CI=confidence interval; COPD=chronic obstructive pulmonary disease; MI=myocardial infarction; NSTEMI=non-ST-segment-elevation myocardial infarction; STEMI=ST-segment-elevation myocardial infarction; Q=quintile.

**Table S4 - Hazard ratios for heart failure in patients following a first myocardial infarction stratified on a history of revascularization.**

|                                                  | Model 4<br>Subjects without a<br>history of<br>revascularization<br>n = 21,160<br>n events = 5,222 | Model 4<br>Subjects with a<br>history of<br>revascularization<br>n = 3,319<br>n events = 553 |
|--------------------------------------------------|----------------------------------------------------------------------------------------------------|----------------------------------------------------------------------------------------------|
|                                                  | HR (95% CI)                                                                                        | HR (95% CI)                                                                                  |
| Age, per 10 years increase                       | 1.48 (1.44 – 1.52)                                                                                 | 1.30 (1.17 – 1.44)                                                                           |
| Men                                              | 1.07 (1.01 – 1.14)                                                                                 | 0.96 (0.75 – 1.23)                                                                           |
| Index of multiple deprivation                    | overall p = <0.001                                                                                 | overall p = <0.001                                                                           |
| Q1                                               | Reference                                                                                          | Reference                                                                                    |
| Q2                                               | 1.06 (0.95 – 1.17)                                                                                 | 1.13 (0.80 – 1.61)                                                                           |
| Q3                                               | 1.14 (1.02 – 1.27)                                                                                 | 1.39 (0.95 – 2.03)                                                                           |
| Q4                                               | 1.15 (1.02 – 1.28)                                                                                 | 1.34 (0.85 – 2.02)                                                                           |
| Q5                                               | 1.22 (1.08 – 1.38)                                                                                 | 1.29 (0.84 – 1.99)                                                                           |
| History of hypertension                          | 1.14 (1.07 – 1.22)                                                                                 | 1.18 (0.92 – 1.50)                                                                           |
| History of diabetes                              | 1.49 (1.37 – 1.61)                                                                                 | 1.32 (1.00 – 1.75)                                                                           |
| History of atrial fibrillation                   | 1.61 (1.48 – 1.74)                                                                                 | 1.90 (1.39 – 2.58)                                                                           |
| Type of MI                                       |                                                                                                    |                                                                                              |
| STEMI                                            | 1.14 (1.05 – 1.23)                                                                                 | 1.39 (1.07 – 1.79)                                                                           |
| History of peripheral arterial disease           | 1.40 (1.27 – 1.55)                                                                                 | 1.22 (0.88 – 1.62)                                                                           |
| History of COPD                                  | 1.30 (1.18 – 1.43)                                                                                 | 1.36 (0.92 – 2.03)                                                                           |
| ACE inhibitor use before MI                      | 1.11 (1.03 – 1.19)                                                                                 | 1.15 (0.89 – 1.49)                                                                           |
| Angiotensin receptor blocker (ARB) use before MI | 1.06 (0.94 – 1.19)                                                                                 | 0.79 (0.54 – 1.17)                                                                           |
| Beta-blocker use before MI                       | 1.00 (0.94 – 1.07)                                                                                 | 0.84 (0.65 – 1.08)                                                                           |

All analyses are based on a complete case analysis. Overall p-values are shown for categorical covariates. ACE=Angiotensin-converting enzyme; CI=confidence interval; COPD=chronic obstructive pulmonary disease; MI=myocardial infarction; NSTEMI=non-ST-segment-elevation myocardial infarction; STEMI=ST-segment-elevation myocardial infarction; Q=quintile.

**Supplementary Figure 1 – Cumulative incidence curves for HF accounting for mortality as first event after index MI**

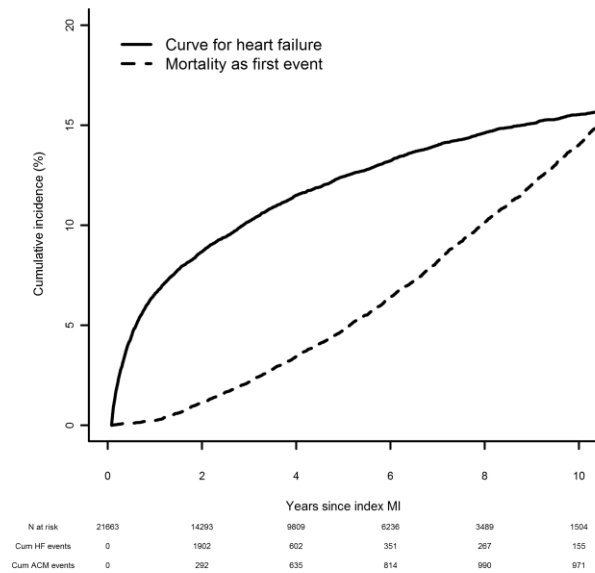

Cumulative incidence curves adjusted for competing risk of mortality as first event. 10-year follow-up in patients who survived the first 30 days and did not develop HF during the first 30 days (30 days event free).
